# Supplementary material for: Optimizing layer-by-layer deposition of interpolymer complexes on solid substrates using Biacore
Source: Royal Society of Chemistry journal article supplement (doi:10.1039/c2sm25652e), 2012-01-01
Supplement: c2sm25652e.pdf [file c2sm25652e.pdf]

## Electronic supplementary information

for

### Optimizing Layer-by-Layer Deposition of Interpolymer Complexes on Solid Substrates

Using Biacore

by

Samuel C. Bizley<sup>†</sup>, Adrian C. Williams<sup>†</sup>, Fred Kemp<sup>†</sup> and Vitaliy V. Khutoryanskiy<sup>\*,†</sup>

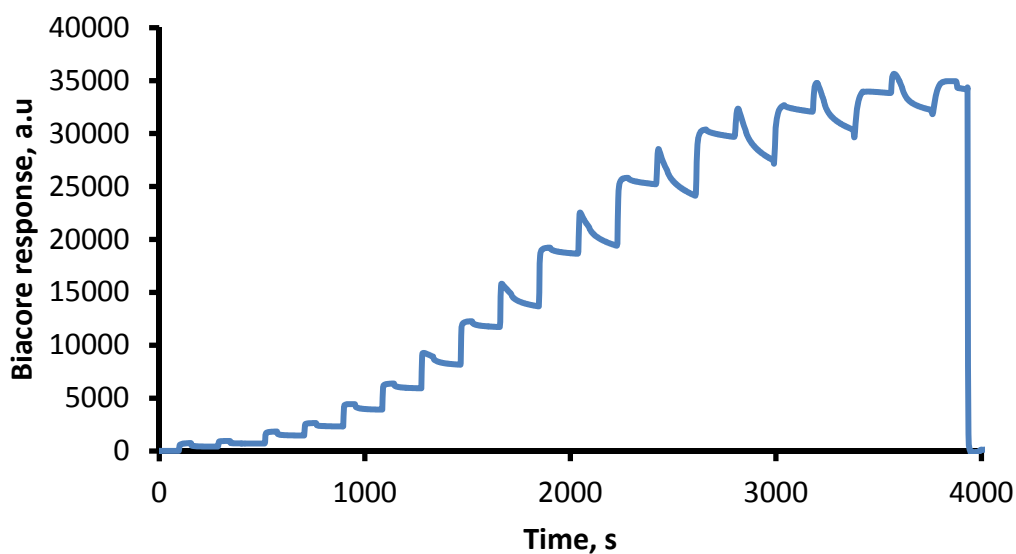

Figure 1. Biacore sensogram for the formation of poly(acrylic acid) (PAA) and methylcellulose (MC) multilayers at pH 2. Polymer concentrations are 0.2% w/v PAA (450 kDa) and 0.2% w/v MC.

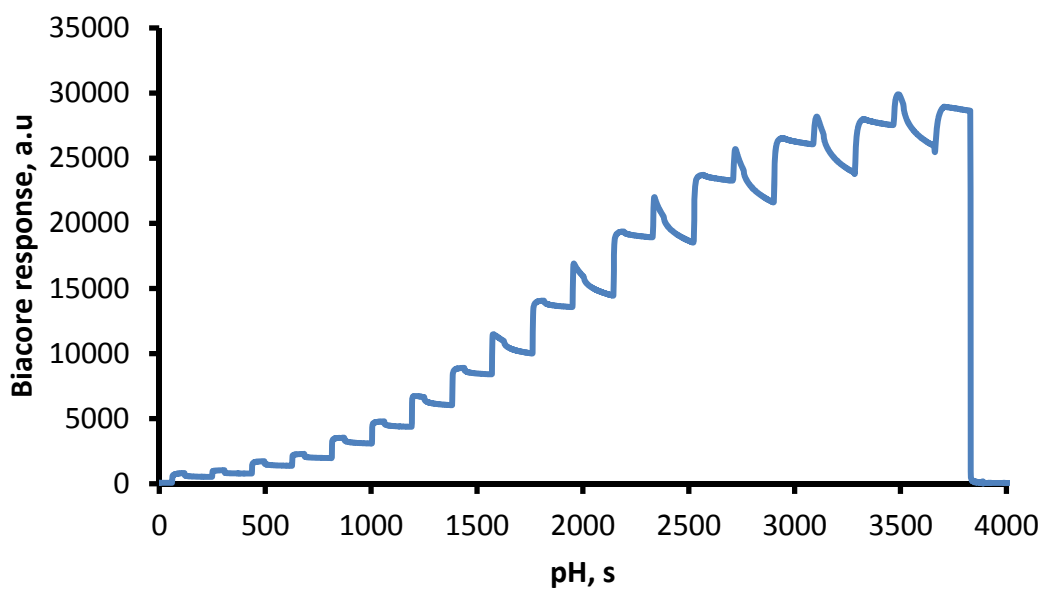

Figure 2. Biacore sensogram for the formation of poly(acrylic acid) (PAA) and methylcellulose (MC) multilayers at pH 2.5. Polymer concentrations are 0.2% w/v PAA (450 kDa) and 0.2% w/v MC.

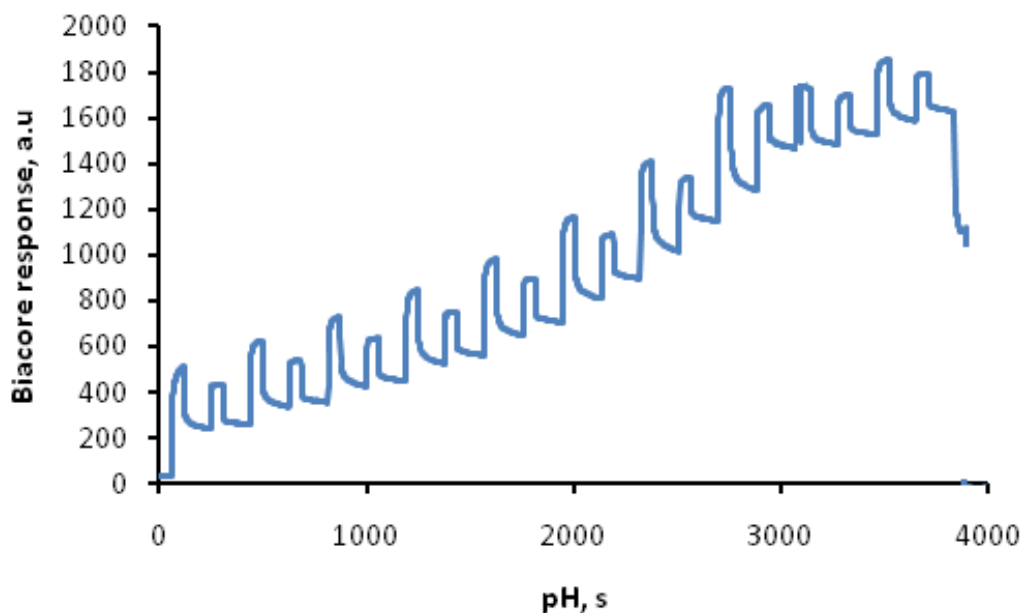

Figure 3. Biacore sensogram for the formation of poly(acrylic acid) (PAA) and methylcellulose (MC) multilayers at pH 3. Polymer concentrations are 0.2% w/v PAA (450 kDa) and 0.2% w/v MC.

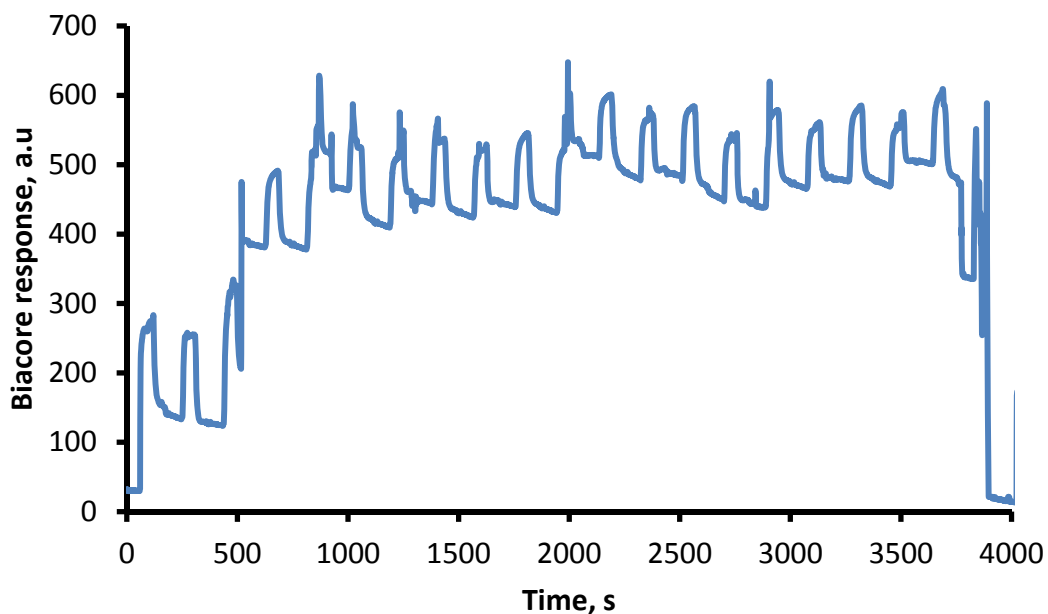

Figure 4. Biacore sensogram for the formation of poly(acrylic acid) (PAA) and methylcellulose (MC) multilayers at pH 3.5. Polymer concentrations are 0.2% w/v PAA (450 kDa) and 0.2% w/v MC.

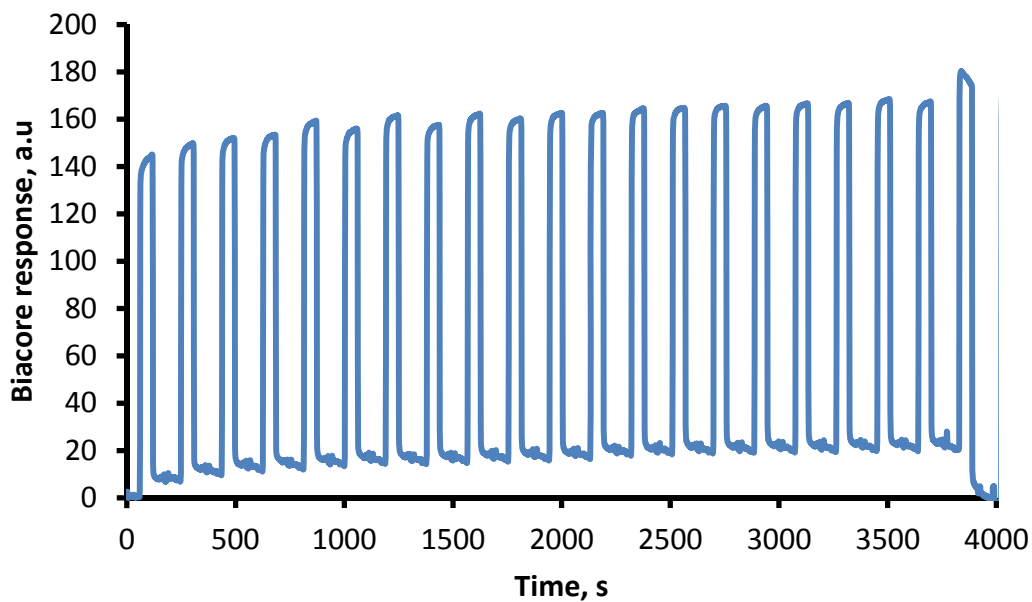

Figure 5. Biacore sensogram for the formation of poly(acrylic acid) (PAA) and methylcellulose (MC) multilayers at pH 4. Polymer concentrations are 0.2% w/v PAA (450 kDa) and 0.2% w/v MC.

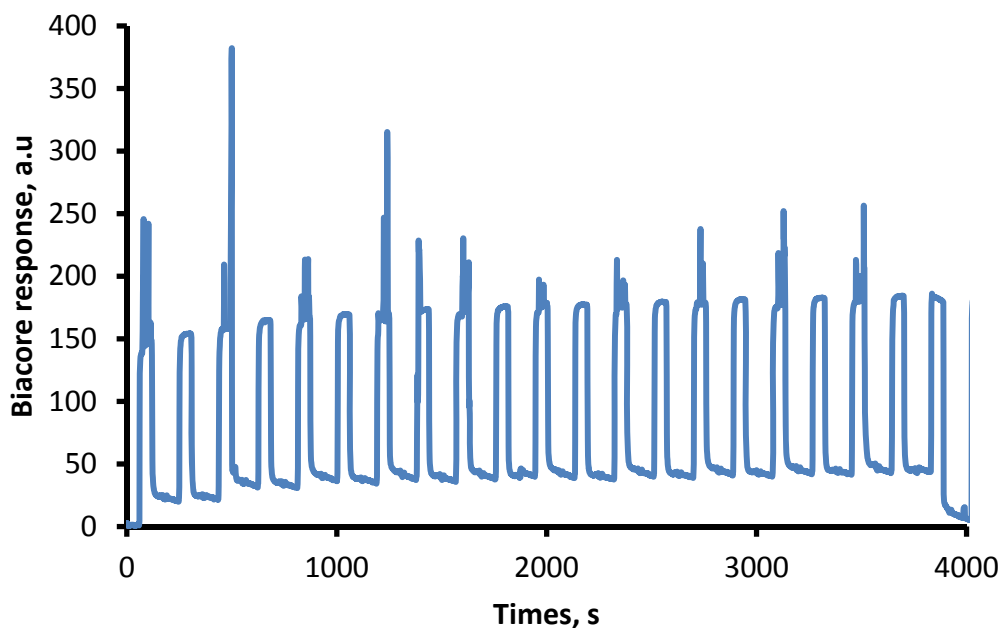

Figure 6. Biacore sensogram for the formation of poly(acrylic acid) (PAA) and methylcellulose (MC) multilayers at pH 4.5. Polymer concentrations are 0.2% w/v PAA (450 kDa) and 0.2% w/v MC.

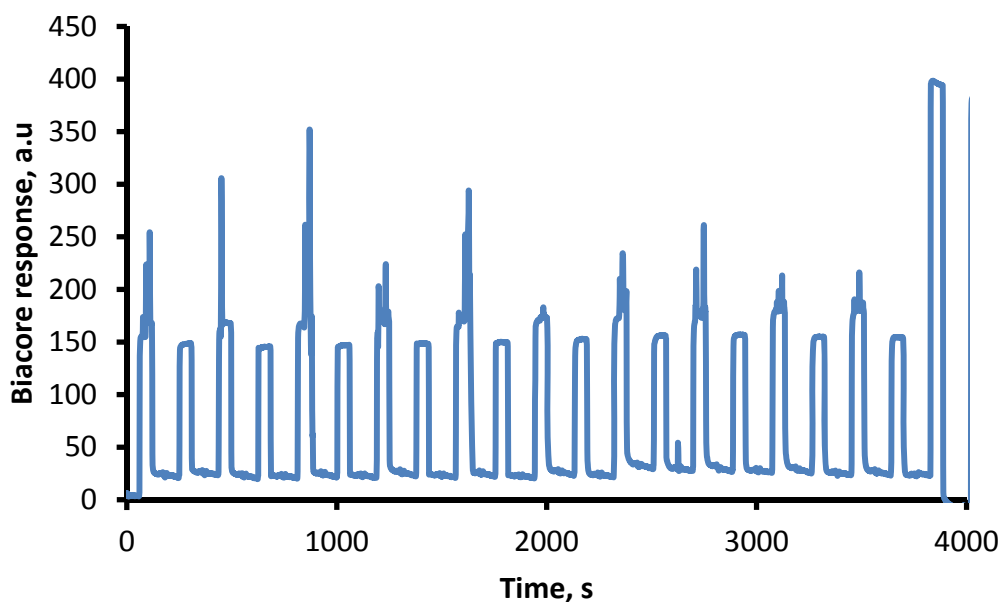

Figure 7. Biacore sensogram for the formation of poly(acrylic acid) (PAA) and methylcellulose (MC) multilayers at pH 5. Polymer concentrations are 0.2% w/v PAA (450 kDa) and 0.2% w/v MC.

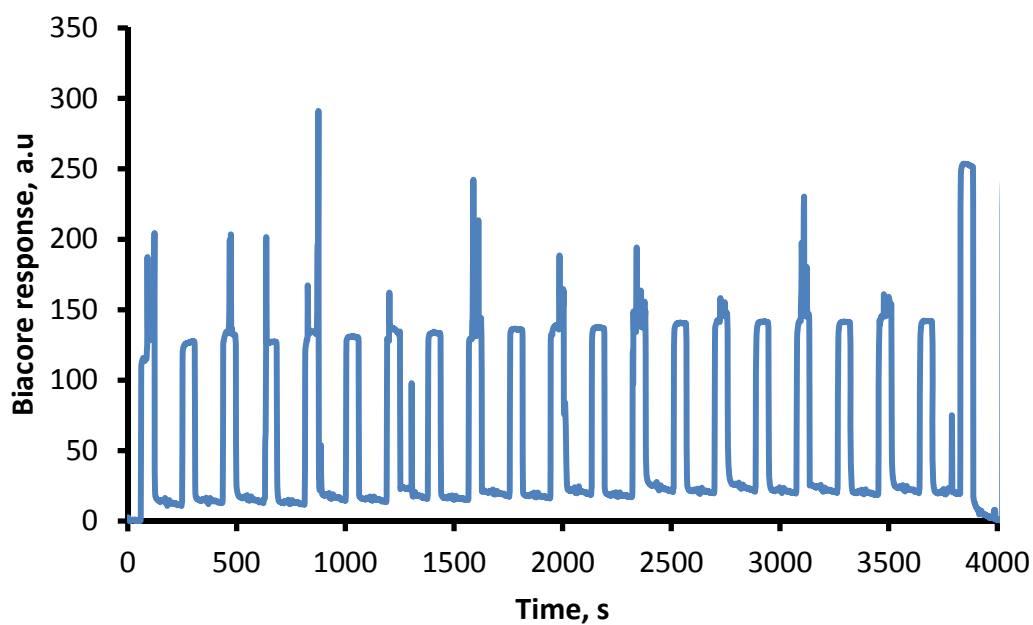

Figure 8. Biacore sensogram for the formation of poly(acrylic acid) (PAA) and methylcellulose (MC) multilayers at pH 5.5. Polymer concentrations are 0.2% w/v PAA (450 kDa) and 0.2% w/v MC.

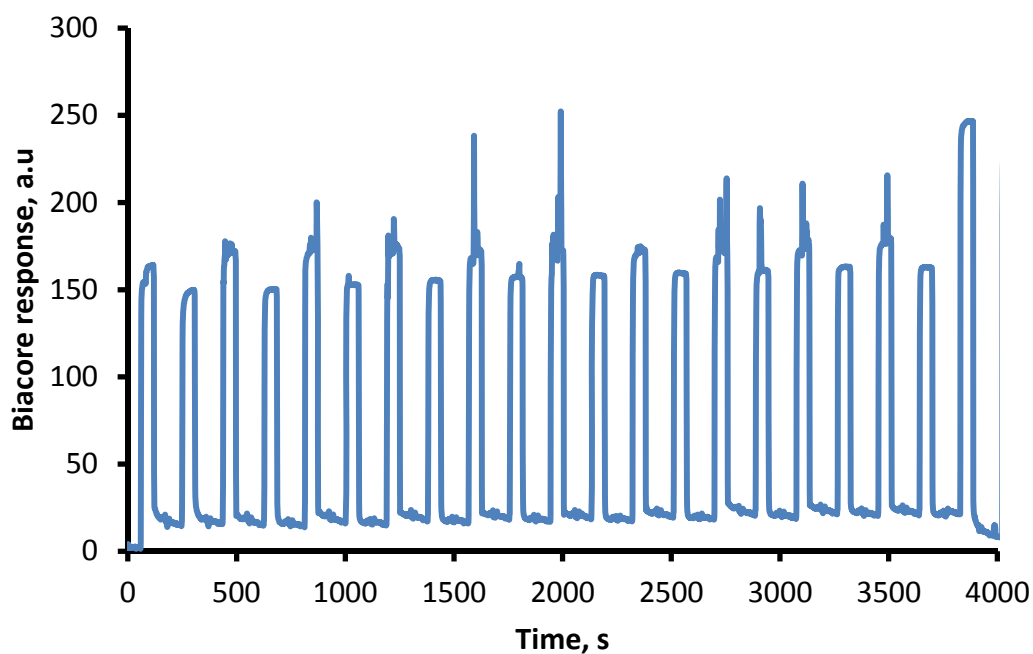

Figure 9. Biacore sensogram for the formation of poly(acrylic acid) (PAA) and methylcellulose (MC) multilayers at pH 6. Polymer concentrations are 0.2% w/v PAA (450 kDa) and 0.2% w/v MC.

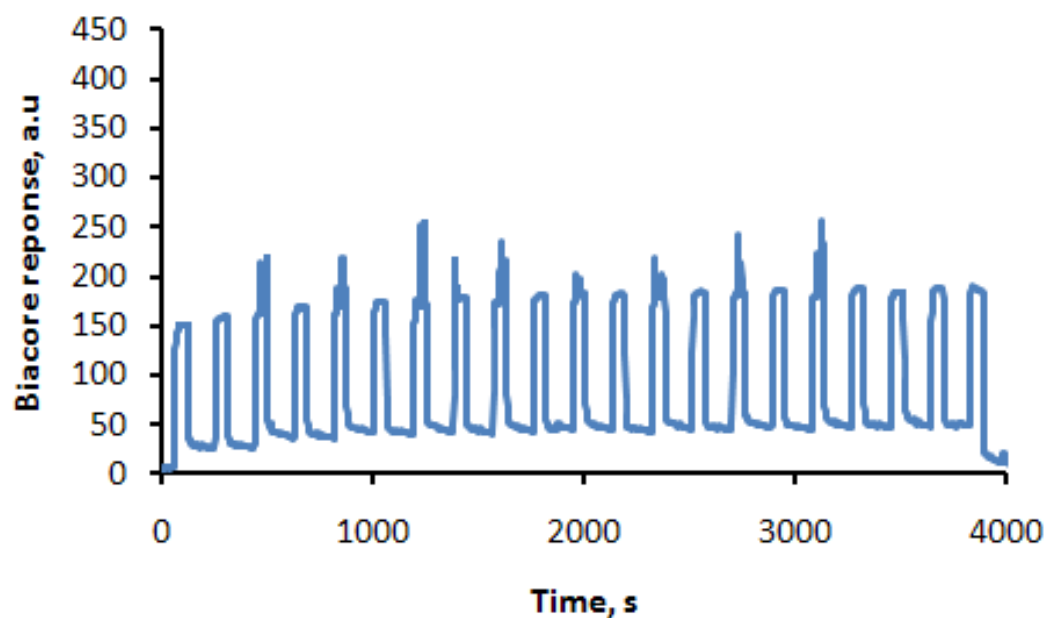

Figure 10. Biacore sensogram for the formation of poly(acrylic acid) (PAA) and methylcellulose (MC) multilayers at pH 6.5. Polymer concentrations are 0.2% w/v PAA (450 kDa) and 0.2% w/v MC.

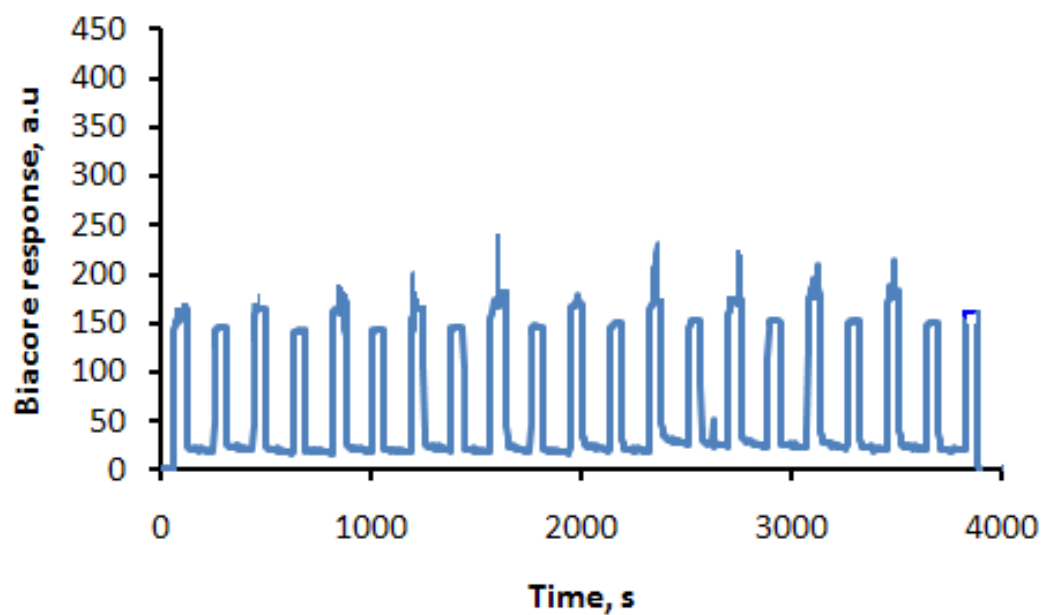

Figure 11. Biacore sensogram for the formation of poly(acrylic acid) (PAA) and methylcellulose (MC) multilayers at pH 7. Polymer concentrations are 0.2% w/v PAA (450 kDa) and 0.2% w/v MC.
